# Supplementary material for: Toxicity analysis of poly(sodium-4-styrenesulfonate) coated graphene on HMEC-1 cells under dynamic conditions mimicking blood flow
Source: Royal Society of Chemistry journal article supplement (doi:10.1039/c7ra08286j), 2017-01-01
Supplement: c7ra08286j1.pdf [file c7ra08286j1.pdf]

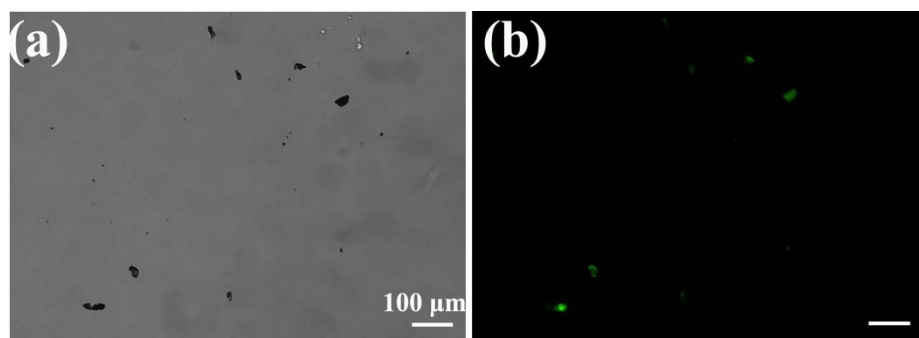

**Figure S1** Dylight 488 fluorescently labeled PSS-graphene were analysed under (a) light scatter mode and (b) fluorescence mode.
